# Supplementary material
Source: publisher site journal article supplement (https://www.spandidos-publications.com/3409/downloadSupplementary)
Supplement: Supplementary file 1 [file downloadSupplementary]

## Sheet: Table S7
Table SVII. Top 193 upregulated mRNAs in GSE30219 (filtration citeria, P-value <0.05 and LogFC ≥2).
ID	adj.P.Val	P-Value	t	B	logFC	Gene.symbol	Gene.title
204580_at	9.37e-14	1.41e-15	8.61665	24.7804	4.73416	MMP12	matrix metallopeptidase 12
204475_at	3.57e-08	1.76e-09	6.28488	11.0546	3.99067	MMP1	matrix metallopeptidase 1
209875_s_at	3.28e-17	2.71e-19	9.89095	33.1872	3.87991	SPP1	secreted phosphoprotein 1
201292_at	1.33e-16	1.2e-18	9.67434	31.7243	3.79722	TOP2A	topoisomerase (DNA) II alpha
222608_s_at	9.78e-16	1.05e-17	9.35526	29.5929	3.66624	ANLN	anillin actin binding protein
201291_s_at	5.92e-15	7.29e-17	9.06627	27.6887	3.61816	TOP2A	topoisomerase (DNA) II alpha
219918_s_at	2.62e-16	2.51e-18	9.5665	31.0007	3.60787	ASPM	abnormal spindle microtubule assembly
218469_at	1.89e-09	6.83e-11	6.86467	14.22	3.54073	GREM1	gremlin 1, DAN family BMP antagonist
203764_at	1.38e-13	2.14e-15	8.55262	24.372	3.52952	DLGAP5	DLG associated protein 5
218468_s_at	3.6e-09	1.39e-10	6.74105	13.5297	3.50227	GREM1	gremlin 1, DAN family BMP antagonist
219148_at	1.31e-11	2.89e-13	7.7787	19.5611	3.46749	PBK	PDZ binding kinase
205242_at	2.84e-08	1.37e-09	6.3313	11.3011	3.46275	CXCL13	C-X-C motif chemokine ligand 13
225681_at	4.71e-23	1.51e-25	11.9189	47.3673	3.37361	CTHRC1	collagen triple helix repeat containing 1
210052_s_at	1.45e-13	2.25e-15	8.54459	24.3208	3.34453	TPX2	TPX2, microtubule nucleation factor
202954_at	5.71e-13	9.81e-15	8.31629	22.8777	3.32727	UBE2C	ubiquitin conjugating enzyme E2 C
214612_x_at	0.00115	0.000227	3.74955	-0.237592	3.31435	MAGEA6	MAGE family member A6
202095_s_at	7.57e-13	1.34e-14	8.26784	22.5739	3.31286	BIRC5	baculoviral IAP repeat containing 5
223062_s_at	9.76e-13	1.76e-14	8.22426	22.3016	3.2514	PSAT1	phosphoserine aminotransferase 1
209942_x_at	0.00168	0.000351	3.63133	-0.646717	3.24949	MAGEA6///MAGEA3	MAGE family member A6///MAGE family member A3
204962_s_at	6.99e-13	1.22e-14	8.28178	22.6612	3.2368	SLC35F6///CENPA	solute carrier family 35 member F6///centromere protein A
206102_at	2.12e-14	2.87e-16	8.85972	26.3441	3.1894	GINS1	GINS complex subunit 1
201890_at	1.81e-14	2.42e-16	8.88542	26.5106	3.18177	RRM2	ribonucleotide reductase regulatory subunit M2
203820_s_at	1.53e-07	8.93e-09	5.98231	9.47913	3.16216	IGF2BP3	insulin like growth factor 2 mRNA binding protein 3
202870_s_at	1.57e-11	3.49e-13	7.7485	19.3784	3.16192	CDC20	cell division cycle 20
223381_at	2.32e-11	5.32e-13	7.67974	18.9639	3.16099	NUF2	NUF2, NDC80 kinetochore complex component
37892_at	7.5e-07	5.29e-08	5.63813	7.75525	3.15794	COL11A1	collagen type XI alpha 1 chain
1555758_a_at	4.1e-13	6.88e-15	8.37149	23.2248	3.14778	CDKN3	cyclin dependent kinase inhibitor 3
204641_at	2.58e-12	5.05e-14	8.05818	21.2704	3.11532	NEK2	NIMA related kinase 2
203755_at	9.71e-15	1.23e-16	8.98729	27.1729	3.10053	BUB1B	BUB1 mitotic checkpoint serine/threonine kinase B
202311_s_at	4.84e-14	6.99e-16	8.72418	25.4696	3.09316	COL1A1	collagen type I alpha 1 chain
202705_at	2.12e-13	3.4e-15	8.48082	23.9158	3.08141	CCNB2	cyclin B2
209773_s_at	2.93e-14	4.05e-16	8.80731	26.0052	3.05842	RRM2	ribonucleotide reductase regulatory subunit M2
204825_at	3.06e-13	5.05e-15	8.4197	23.5289	3.0429	MELK	maternal embryonic leucine zipper kinase
204822_at	7.29e-11	1.91e-12	7.47041	17.7152	3.0381	TTK	TTK protein kinase
202831_at	0.000275	4.3e-05	4.1754	1.3303	3.02844	GPX2	glutathione peroxidase 2
224428_s_at	4.1e-16	4.1e-18	9.49406	30.5165	3.02349	CDCA7	cell division cycle associated 7
225655_at	1.32e-14	1.73e-16	8.93609	26.8396	3.00992	UHRF1	ubiquitin like with PHD and ring finger domains 1
218542_at	6.24e-14	9.15e-16	8.68301	25.2052	3.00487	CEP55	centrosomal protein 55
209714_s_at	1.39e-12	2.58e-14	8.16423	21.9276	2.99426	CDKN3	cyclin dependent kinase inhibitor 3
230030_at	4.57e-08	2.32e-09	6.23448	10.7884	2.96344	HS6ST2	heparan sulfate 6-O-sulfotransferase 2
202503_s_at	6.91e-17	5.87e-19	9.77892	32.429	2.95371	KIAA0101	KIAA0101
217428_s_at	3.53e-08	1.74e-09	6.28676	11.0646	2.94057	COL10A1	collagen type X alpha 1 chain
1552767_a_at	4.63e-08	2.35e-09	6.23183	10.7744	2.93501	HS6ST2	heparan sulfate 6-O-sulfotransferase 2
207828_s_at	7.8e-13	1.38e-14	8.2624	22.5399	2.93323	CENPF	centromere protein F
206561_s_at	0.0027	0.000618	3.47421	-1.17246	2.92483	AKR1B10	aldo-keto reductase family 1 member B10
228729_at	2.19e-14	2.97e-16	8.85419	26.3083	2.90018	CCNB1	cyclin B1
214710_s_at	4.64e-14	6.67e-16	8.73136	25.5157	2.89919	CCNB1	cyclin B1
223229_at	1.82e-16	1.69e-18	9.62478	31.3914	2.89891	UBE2T	ubiquitin conjugating enzyme E2 T
227174_at	0.000273	4.26e-05	4.17761	1.33881	2.88596	WDR72	WD repeat domain 72
222958_s_at	4.17e-11	1.02e-12	7.57411	18.3313	2.861	DEPDC1	DEP domain containing 1
223278_at	0.000179	2.63e-05	4.29534	1.79788	2.84806	GJB2	gap junction protein beta 2
218355_at	7.8e-13	1.38e-14	8.2625	22.5405	2.84752	KIF4A	kinesin family member 4A
203418_at	1.75e-11	3.94e-13	7.72874	19.2591	2.79968	CCNA2	cyclin A2
218009_s_at	3.23e-12	6.42e-14	8.02004	21.0353	2.7982	PRC1	protein regulator of cytokinesis 1
1552619_a_at	3.27e-11	7.8e-13	7.61751	18.5906	2.79528	ANLN	anillin actin binding protein
203967_at	1.9e-11	4.3e-13	7.71438	19.1725	2.78022	CDC6	cell division cycle 6
232278_s_at	5.38e-10	1.7e-11	7.10404	15.5794	2.75689	DEPDC1	DEP domain containing 1
203819_s_at	3.77e-06	3.26e-07	5.27105	6.00112	2.75334	IGF2BP3	insulin like growth factor 2 mRNA binding protein 3
205941_s_at	1.17e-08	5.07e-10	6.51109	12.2674	2.74534	COL10A1	collagen type X alpha 1 chain
218039_at	1.16e-12	2.12e-14	8.19532	22.1211	2.70376	NUSAP1	nucleolar and spindle associated protein 1
208079_s_at	1.16e-14	1.5e-16	8.95761	26.9796	2.70084	AURKA	aurora kinase A
206364_at	8.21e-13	1.46e-14	8.25358	22.4847	2.69982	KIF14	kinesin family member 14
209642_at	6.58e-11	1.7e-12	7.4894	17.8277	2.69974	BUB1	BUB1 mitotic checkpoint serine/threonine kinase
210559_s_at	4.28e-11	1.05e-12	7.56902	18.3009	2.68603	CDK1	cyclin dependent kinase 1
206239_s_at	0.00496	0.00127	3.26535	-1.83897	2.66871	SPINK1	serine peptidase inhibitor, Kazal type 1
218755_at	1.95e-12	3.75e-14	8.10559	21.5637	2.66814	KIF20A	kinesin family member 20A
204444_at	1.41e-12	2.61e-14	8.16252	21.9169	2.66131	KIF11	kinesin family member 11
204162_at	1.66e-09	5.94e-11	6.88887	14.3561	2.65804	NDC80	NDC80, kinetochore complex component
1554768_a_at	3.58e-10	1.09e-11	7.17976	16.0155	2.65006	MAD2L1	MAD2 mitotic arrest deficient-like 1 (yeast)
209125_at	0.0318	0.0121	2.53165	-3.87842	2.64991	KRT6A	keratin 6A
203744_at	1.09e-13	1.65e-15	8.59221	24.6243	2.64072	HMGB3	high mobility group box 3
207165_at	1.82e-12	3.44e-14	8.11901	21.6468	2.64011	HMMR	hyaluronan mediated motility receptor
203214_x_at	2.83e-11	6.62e-13	7.64436	18.7514	2.63978	CDK1	cyclin dependent kinase 1
201250_s_at	4.46e-08	2.26e-09	6.23929	10.8138	2.6394	SLC2A1	solute carrier family 2 member 1
206023_at	4.87e-06	4.36e-07	5.21046	5.72026	2.63687	NMU	neuromedin U
204092_s_at	3.98e-15	4.69e-17	9.13255	28.1231	2.63366	AURKA	aurora kinase A
204026_s_at	5.87e-15	7.2e-17	9.06813	27.7009	2.62516	ZWINT	ZW10 interacting kinetochore protein
223307_at	2.76e-12	5.41e-14	8.04723	21.2028	2.62007	CDCA3	cell division cycle associated 3
205034_at	3.59e-09	1.38e-10	6.7414	13.5316	2.59818	CCNE2	cyclin E2
203362_s_at	7.62e-10	2.49e-11	7.03829	15.2031	2.57199	MAD2L1	MAD2 mitotic arrest deficient-like 1 (yeast)
219787_s_at	1.89e-12	3.6e-14	8.11207	21.6038	2.55138	ECT2	epithelial cell transforming 2
205229_s_at	8.34e-06	7.99e-07	5.08275	5.13662	2.55081	COCH	cochlin
201387_s_at	6.72e-05	8.54e-06	4.55979	2.86793	2.54732	UCHL1	ubiquitin C-terminal hydrolase L1
220651_s_at	1.08e-09	3.63e-11	6.97417	14.8382	2.53908	MCM10	minichromosome maintenance 10 replication initiation factor
204320_at	3.96e-06	3.44e-07	5.25955	5.94762	2.52574	COL11A1	collagen type XI alpha 1 chain
242881_x_at	5.53e-08	2.86e-09	6.1954	10.583	2.52498	DUXAP10	double homeobox A pseudogene 10
236641_at	6.52e-11	1.68e-12	7.49127	17.8388	2.51963	KIF14	kinesin family member 14
203889_at	2.64e-06	2.2e-07	5.35208	6.38057	2.51502	SCG5	secretogranin V
205394_at	2.87e-11	6.76e-13	7.64092	18.7309	2.50959	CHEK1	checkpoint kinase 1
225834_at	2.65e-08	1.26e-09	6.34617	11.3803	2.48332	FAM72A///FAM72D///FAM72B///FAM72C	family with sequence similarity 72 member A///family with sequence similarity 72 member D///family with sequence similarity 72 member B///family with sequence similarity 72 member C
226777_at	1.45e-08	6.45e-10	6.46756	12.0318	2.47823	ADAM12	ADAM metallopeptidase domain 12
218663_at	7.45e-10	2.43e-11	7.04259	15.2276	2.47616	NCAPG	non-SMC condensin I complex subunit G
231771_at	0.00933	0.00271	3.03368	-2.53437	2.47311	GJB6	gap junction protein beta 6
202310_s_at	4.53e-11	1.12e-12	7.55851	18.2383	2.46207	COL1A1	collagen type I alpha 1 chain
1558048_x_at	1.46e-08	6.51e-10	6.46606	12.0237	2.4601
209921_at	8.27e-06	7.91e-07	5.08508	5.14717	2.45709	SLC7A11	solute carrier family 7 member 11
218726_at	5.39e-12	1.11e-13	7.93207	20.495	2.45479	HJURP	Holliday junction recognition protein
218662_s_at	6.09e-11	1.56e-12	7.50399	17.9142	2.4439	NCAPG	non-SMC condensin I complex subunit G
209408_at	1.17e-10	3.22e-12	7.38376	17.2043	2.43496	KIF2C	kinesin family member 2C
211071_s_at	4.47e-06	3.95e-07	5.23091	5.81476	2.42997	MLLT11	myeloid/lymphoid or mixed-lineage leukemia; translocated to, 11
217678_at	2.29e-05	2.5e-06	4.8358	4.04063	2.42522	SLC7A11	solute carrier family 7 member 11
209709_s_at	7.6e-12	1.6e-13	7.87408	20.1407	2.4219	HMMR	hyaluronan mediated motility receptor
202580_x_at	1.64e-09	5.86e-11	6.89119	14.3691	2.40815	FOXM1	forkhead box M1
219978_s_at	4.09e-10	1.25e-11	7.15532	15.8744	2.40454	NUSAP1	nucleolar and spindle associated protein 1
205393_s_at	1.5e-10	4.21e-12	7.33873	16.9401	2.39535	CHEK1	checkpoint kinase 1
202589_at	6.72e-11	1.74e-12	7.48567	17.8056	2.38735	TYMS	thymidylate synthetase
1553413_at	0.000208	3.12e-05	4.25373	1.63441	2.37697	LCAL1	lung cancer associated lncRNA 1
226980_at	1.31e-09	4.53e-11	6.93586	14.6212	2.3736	DEPDC1B	DEP domain containing 1B
212353_at	6.4e-09	2.6e-10	6.63023	12.9177	2.34757	SULF1	sulfatase 1
219990_at	1.88e-12	3.56e-14	8.11359	21.6132	2.34502	E2F8	E2F transcription factor 8
206134_at	3.86e-06	3.34e-07	5.26559	5.9757	2.34214	ADAMDEC1	ADAM like decysin 1
242517_at	4.01e-06	3.5e-07	5.25619	5.932	2.34072	KISS1R	KISS1 receptor
228273_at	6.82e-09	2.79e-10	6.61768	12.8489	2.33565	PRR11	proline rich 11
203358_s_at	3.23e-10	9.71e-12	7.19856	16.1241	2.33003	EZH2	enhancer of zeste 2 polycomb repressive complex 2 subunit
218883_s_at	2.92e-09	1.1e-10	6.78212	13.7581	2.31392	CENPU	centromere protein U
203213_at	4.22e-09	1.64e-10	6.71124	13.3644	2.31044	CDK1	cyclin dependent kinase 1
209464_at	8.43e-10	2.78e-11	7.01999	15.0987	2.30765	AURKB	aurora kinase B
204318_s_at	6.03e-10	1.93e-11	7.08218	15.4541	2.30592	GTSE1	G2 and S-phase expressed 1
222039_at	1.18e-11	2.56e-13	7.79845	19.6808	2.30405	KIF18B	kinesin family member 18B
203968_s_at	1.26e-10	3.47e-12	7.37121	17.1305	2.3032	CDC6	cell division cycle 6
221521_s_at	4.71e-09	1.86e-10	6.68979	13.2458	2.29284	GINS2	GINS complex subunit 2
209891_at	4.51e-08	2.28e-09	6.23732	10.8034	2.289	SPC25	SPC25, NDC80 kinetochore complex component
204709_s_at	2.05e-09	7.44e-11	6.84976	14.1363	2.28879	KIF23	kinesin family member 23
228323_at	1.46e-10	4.07e-12	7.34465	16.9748	2.28788	KNL1	kinetochore scaffold 1
204086_at	0.000163	2.37e-05	4.31965	1.89401	2.28276	PRAME	preferentially expressed antigen in melanoma
213599_at	2.91e-08	1.4e-09	6.32711	11.2788	2.27841	OIP5	Opa interacting protein 5
218782_s_at	3.27e-11	7.77e-13	7.61801	18.5936	2.27701	ATAD2	ATPase family, AAA domain containing 2
219306_at	1.33e-10	3.68e-12	7.36133	17.0725	2.27094	KIF15	kinesin family member 15
205046_at	4.3e-11	1.05e-12	7.56827	18.2965	2.26659	CENPE	centromere protein E
211519_s_at	5.31e-10	1.67e-11	7.10664	15.5943	2.26297	KIF2C	kinesin family member 2C
222740_at	1.06e-12	1.92e-14	8.21109	22.2194	2.24612	ATAD2	ATPase family, AAA domain containing 2
200606_at	2.91e-07	1.84e-08	5.84414	8.77816	2.24568	DSP	desmoplakin
204855_at	0.0144	0.00457	2.86544	-3.00988	2.24295	SERPINB5	serpin family B member 5
213007_at	5.54e-11	1.4e-12	7.5217	18.0193	2.23114	FANCI	Fanconi anemia complementation group I
212344_at	2.12e-09	7.74e-11	6.84287	14.0977	2.2292	SULF1	sulfatase 1
222037_at	2.04e-12	3.92e-14	8.0984	21.5192	2.21648	MCM4	minichromosome maintenance complex component 4
1554696_s_at	1.42e-09	4.99e-11	6.91898	14.5259	2.21624	TYMS	thymidylate synthetase
202094_at	4.3e-10	1.33e-11	7.14566	15.8187	2.21533	BIRC5	baculoviral IAP repeat containing 5
204675_at	4.03e-10	1.23e-11	7.15804	15.8901	2.21462	SRD5A1	steroid 5 alpha-reductase 1
205064_at	0.0426	0.0172	2.40047	-4.19207	2.21336	SPRR1B	small proline rich protein 1B
228956_at	8.34e-05	1.09e-05	4.50304	2.63381	2.213	UGT8	UDP glycosyltransferase 8
229490_s_at	6.27e-12	1.31e-13	7.90666	20.3396	2.20791
1555778_a_at	4.84e-08	2.47e-09	6.22261	10.7259	2.20556	POSTN	periostin
222036_s_at	2.81e-12	5.54e-14	8.04362	21.1806	2.2048	MCM4	minichromosome maintenance complex component 4
228033_at	8.21e-06	7.83e-07	5.08703	5.15602	2.20453	E2F7	E2F transcription factor 7
238617_at	1.27e-13	1.95e-15	8.56662	24.4611	2.2044	KIF26B	kinesin family member 26B
218960_at	4.58e-05	5.49e-06	4.66066	3.28998	2.19991	TMPRSS4	transmembrane protease, serine 4
218796_at	3.11e-07	1.98e-08	5.82998	8.70699	2.19466	FERMT1	fermitin family member 1
224753_at	8.18e-11	2.16e-12	7.44979	17.5933	2.18726	CDCA5	cell division cycle associated 5
204146_at	8.4e-09	3.51e-10	6.57679	12.6251	2.18317	RAD51AP1	RAD51 associated protein 1
206224_at	0.000367	5.99e-05	4.09337	1.017	2.18301	CST1	cystatin SN
214023_x_at	0.00365	0.000879	3.37309	-1.49978	2.17478	TUBB2B	tubulin beta 2B class IIb
201195_s_at	9.68e-09	4.11e-10	6.54869	12.4718	2.17375	SLC7A5	solute carrier family 7 member 5
203554_x_at	1.1e-10	3e-12	7.39515	17.2712	2.17188	PTTG1	pituitary tumor-transforming 1
202107_s_at	1.39e-09	4.85e-11	6.92385	14.5534	2.16041	MCM2	minichromosome maintenance complex component 2
201014_s_at	6.15e-16	6.36e-18	9.42946	30.086	2.15523	PAICS	phosphoribosylaminoimidazole carboxylase; phosphoribosylaminoimidazolesuccinocarboxamide synthase
1554408_a_at	2.26e-11	5.17e-13	7.68452	18.9927	2.15101	TK1	thymidine kinase 1
210467_x_at	0.00372	0.000899	3.36677	-1.51995	2.14924	MAGEA12	MAGE family member A12
212354_at	9.23e-09	3.91e-10	6.55769	12.5208	2.14898	SULF1	sulfatase 1
219555_s_at	8.3e-08	4.52e-09	6.11062	10.1406	2.14806	CENPN	centromere protein N
223642_at	0.000939	0.000179	3.81307	-0.0130062	2.14246	ZIC2	Zic family member 2
60474_at	7.63e-07	5.41e-08	5.6338	7.73407	2.12567	FERMT1	fermitin family member 1
223700_at	5.64e-11	1.43e-12	7.51781	17.9962	2.12026	MND1	meiotic nuclear divisions 1
1555274_a_at	9.69e-13	1.75e-14	8.2255	22.3093	2.11831	EPT1	ethanolaminephosphotransferase 1
213226_at	4.9e-09	1.94e-10	6.68209	13.2033	2.1114	CCNA2	cyclin A2
203145_at	3.63e-10	1.1e-11	7.17721	16.0007	2.1063	SPAG5	sperm associated antigen 5
220892_s_at	8.18e-09	3.39e-10	6.58269	12.6573	2.10436	PSAT1	phosphoserine aminotransferase 1
210334_x_at	7.73e-09	3.2e-10	6.5933	12.7153	2.09671	BIRC5	baculoviral IAP repeat containing 5
1554242_a_at	0.000144	2.05e-05	4.35472	2.03351	2.09329	COCH	cochlin
229802_at	3.98e-08	1.99e-09	6.26267	10.9371	2.08898	WISP1	WNT1 inducible signaling pathway protein 1
211814_s_at	1.04e-06	7.67e-08	5.56447	7.39615	2.08841	CCNE2	cyclin E2
223556_at	1.03e-09	3.47e-11	6.98194	14.8823	2.0871	HELLS	helicase, lymphoid-specific
212022_s_at	5.8e-10	1.84e-11	7.09001	15.4989	2.07958	MKI67	marker of proliferation Ki-67
226456_at	4e-12	8.1e-14	7.98306	20.8078	2.07887	RMI2	RecQ mediated genome instability 2
235609_at	7.31e-10	2.38e-11	7.04606	15.2475	2.06204	BRIP1	BRCA1 interacting protein C-terminal helicase 1
220295_x_at	3.5e-08	1.73e-09	6.28872	11.0749	2.06119	DEPDC1	DEP domain containing 1
1552766_at	8.96e-06	8.66e-07	5.06565	5.05932	2.05716	HS6ST2	heparan sulfate 6-O-sulfotransferase 2
203083_at	6.98e-08	3.71e-09	6.14715	10.3307	2.05486	THBS2	thrombospondin 2
204126_s_at	3.46e-09	1.33e-10	6.74902	13.5739	2.05405	CDC45	cell division cycle 45
228262_at	0.000188	2.78e-05	4.28127	1.74244	2.05253	MAP7D2	MAP7 domain containing 2
212141_at	1.76e-10	5e-12	7.31005	16.7724	2.04649	MCM4	minichromosome maintenance complex component 4
205549_at	0.00197	0.000424	3.57949	-0.822437	2.03822	PCP4	Purkinje cell protein 4
211080_s_at	2.53e-07	1.57e-08	5.87487	8.93302	2.03477	NEK2	NIMA related kinase 2
216548_x_at	2.82e-11	6.58e-13	7.64533	18.7573	2.03091	HMGB3P1	high mobility group box 3 pseudogene 1
225687_at	3.2e-06	2.72e-07	5.3085	6.17596	2.02951	FAM83D	family with sequence similarity 83 member D
227452_at	2.48e-09	9.19e-11	6.813	13.9305	2.0294	LINC00673///LINC00511	long intergenic non-protein coding RNA 673///long intergenic non-protein coding RNA 511
203878_s_at	1.15e-08	4.95e-10	6.51524	12.2899	2.02803	MMP11	matrix metallopeptidase 11
225601_at	5.09e-07	3.44e-08	5.72293	8.17305	2.02333	HMGB3	high mobility group box 3
235456_at	4.02e-06	3.51e-07	5.25571	5.92975	2.02286
210387_at	9.47e-06	9.23e-07	5.05224	4.99887	2.01087	HIST1H2BJ///HIST1H2BG	histone cluster 1, H2bj///histone cluster 1, H2bg
226661_at	2.95e-09	1.11e-10	6.78009	13.7468	2.0093	CDCA2	cell division cycle associated 2
222646_s_at	8.72e-11	2.32e-12	7.43793	17.5233	2.00165	ERO1A	endoplasmic reticulum oxidoreductase 1 alpha
204603_at	6.42e-09	2.61e-10	6.62958	12.9142	2.00021	EXO1	exonuclease 1
